# Supplementary material
Source: Springer Nature journal article supplement (https://www.springermedizin.de/resource/supplementary/12885_2009_2055_MOESM5_ESM.pdf/9460406)

A

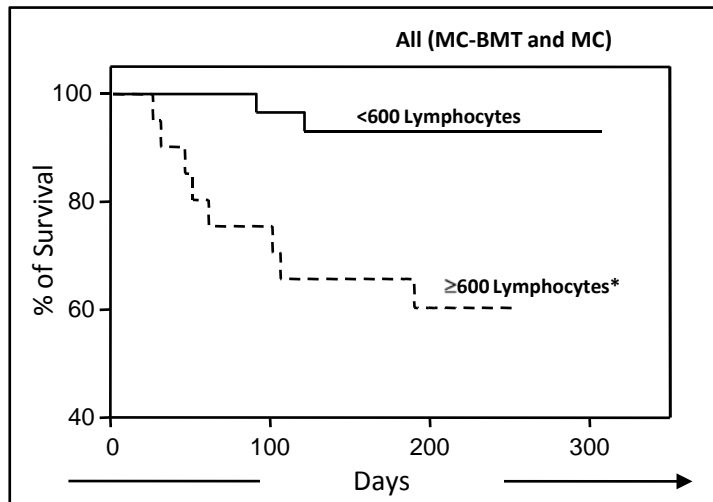

B

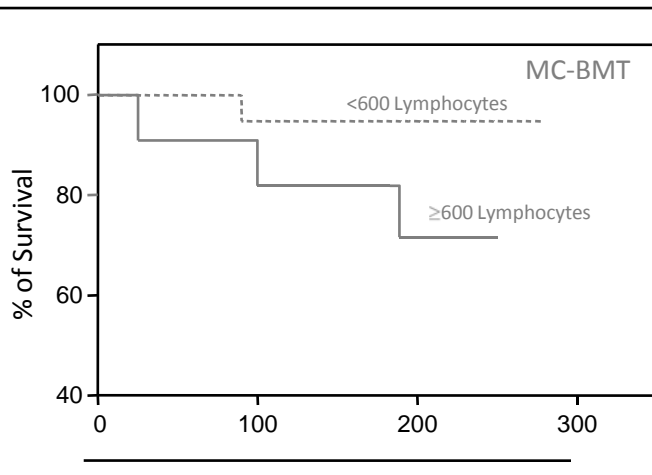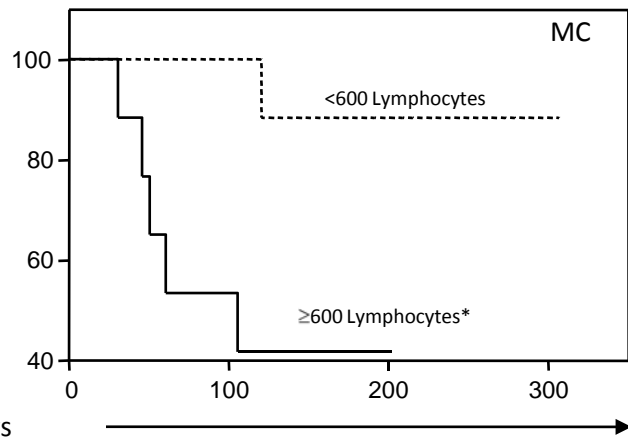

Supplement: MOESM5 [file 9460406]
